# Supplementary material for: In muro deacetylation of xylan affects lignin properties and improves saccharification of aspen wood
Source: PubMed Central journal article supplement (PMC5397736; doi:10.1186/s13068-017-0782-4), 2017-04-20
Supplement: 13068_2017_782_MOESM4_ESM.pdf [file 13068_2017_782_MOESM4_ESM.pdf]

**Additional file 4. Contents of wood components (mg per g of wood d.w.) in transgenic lines 4 and 17 and wild type (WT) determined by sequential extractions and weighing.**

|    | Extractives | Lignin       | Hemicellulose | Cellulose      |
|----|-------------|--------------|---------------|----------------|
| WT | 97.0 ± 3.9  | 181.0 ± 5.3  | 249.1 ± 4.3   | 472.9 ± 0.8    |
| 4  | 99.7 ± 1.2  | 164.2 ± 7.2  | 248.0 ± 11.3  | 488.0 ± 3.5*** |
| 17 | 99.0 ± 07.9 | 173.6 ± 14.2 | 254.3 ± 6.3   | 473.1 ± 6.1    |

Mean ± *SE*, *n* = (3-4) biological replicates. Asterisks next to means of individual lines correspond to means significantly different from wild type (WT) according to the Student's t-test; \*\*\* - *P* ≤ 0.01.

**Additional file 5. Changes in polysaccharide and lignin composition in *AnAXE1* expressing lines (4, 17) compared to the wild type (WT).**

| Line | Soluble polysaccharide composition (mol %) |                |                               |                |                |                               |                |                               | Updegraff cellulose<br>(% wood<br>d.w) | Relative<br>crystallinity<br>(% WT) |                           |
|------|--------------------------------------------|----------------|-------------------------------|----------------|----------------|-------------------------------|----------------|-------------------------------|----------------------------------------|-------------------------------------|---------------------------|
|      | Ara                                        | Rha            | Xyl                           | Man            | MeGlcA         | Gal                           | GalA           | Glc                           |                                        | NMR<br>cellulose                    | XRD<br>sample             |
| WT   | 1.37 ±<br>0.05                             | 1.39 ±<br>0.02 | <b>65.5 ±</b><br><b>0.7**</b> | 5.04 ±<br>0.64 | 3.11 ±<br>0.06 | <b>1.53 ±</b><br><b>0.10*</b> | 4.98 ±<br>0.19 | <b>17.1 ±</b><br><b>0.6**</b> | 44.6 ±<br>0.7                          | <b>100 ±</b><br><b>0****</b>        | <b>100 ±</b><br><b>2*</b> |
| 4    | 1.46 ±<br>0.03                             | 1.30 ±<br>0.07 | 62.3 ±<br>1.4**               | 5.66 ±<br>0.93 | 2.95 ±<br>0.14 | 1.74 ±<br>0.09                | 4.68 ±<br>0.15 | 19.9 ±<br>1.3                 | 44.0 ±<br>0.7                          | 108 ±<br>2****                      | 102 ±<br>3                |
| 17   | 1.46 ±<br>0.06                             | 1.48 ±<br>0.01 | 62.9 ±<br>0.8*                | 5.48 ±<br>0.59 | 3.12 ±<br>0.08 | 1.88 ±<br>0.11                | 5.25 ±<br>0.0  | 18.5 ±<br>0.2                 | 47.9 ±<br>2.1                          | 105 ±<br>4**                        | 106 ±<br>3*               |

Mean ± SE, *n* = (3-5) biological replicates except for lignin S/G ratio, where *n* = (8-18) biological replicates were analyzed. Asterisks next to individual lines correspond to means significantly different from wild type (WT) according to the post ANOVA Student's *t*-test. Asterisks next to WT values in bold type denote significance of contrast between WT and all lines. (\* - *P* ≤ 0.1, \*\* - *P* ≤ 0.5\*, \*\*\* - *P* ≤ 0.01). NMR - nuclear magnetic resonance; XRD = X-ray diffraction.

**Additional File 7. Pyrolysis GC-MS analysis of wood of transgenic (lines 8, 4, and 17) and WT trees.**

| <b>Line</b> | <b>C</b>        | <b>G</b>                        | <b>S</b>                         | <b>H</b>       | <b>P</b>       | <b>L</b>        | <b>S/G</b>                      |
|-------------|-----------------|---------------------------------|----------------------------------|----------------|----------------|-----------------|---------------------------------|
| WT          | 63.08 ±<br>0.52 | <b>11.04 ±</b><br><b>0.16**</b> | <b>18.10 ±</b><br><b>0.24***</b> | 1.89 ±<br>0.05 | 0.30 ±<br>0.01 | 31.33 ±<br>0.37 | <b>1.64 ±</b><br><b>0.02***</b> |
| 8           | 63.38 ±<br>0.46 | 11.41 ±<br>0.28                 | 17.39 ±<br>0.35                  | 1.83 ±<br>0.08 | 0.28 ±<br>0.01 | 30.90 ±<br>0.65 | 1.53 ±<br>0.02**                |
| 4           | 63.51 ±<br>0.61 | 12.13 ±<br>0.19**               | 16.35 ±<br>0.4**                 | 1.80 ±<br>0.09 | 0.28 ±<br>0.01 | 30.56 ±<br>0.45 | 1.35 ±<br>0.04**                |
| 17          | 63.88 ±<br>0.38 | 11.09 ±<br>0.27                 | 17.36 ±<br>0.19                  | 1.81 ±<br>0.11 | 0.27 ±<br>0.01 | 30.54 ±<br>0.40 | 1.52 ±<br>0.04*                 |

C-Carbohydrates, G - Guaiacyl lignin, S - Syringyl lignin, H - *p*-hydroxyphenyl, P - phenolics, L - G+S+H+P, S/G - Syringyl to guaiacyl ratio. All values are relative to the sum of detected identified signals. Mean ± SE, n= (8-18) biological replicates. Asterisks next to individual lines correspond to means significantly different from wild type (WT) according to the Student's t-test. Asterisks next to WT values in bold type denote significance of contrast between WT and transgenic lines (\* -  $P \leq 0.1$ , \*\* -  $P \leq 0.05$ , \*\*\* -  $P \leq 0.01$ ).

**Table S4. Expression of lignin and xylan biosynthetic genes**

|    | F5H         | COMT        | GT43A       | GT43B       |
|----|-------------|-------------|-------------|-------------|
| WT | 1.05 ± 0.22 | 1.06 ± 0.25 | 1.04 ± 0.19 | 1.06 ± 0.23 |
| 4  | 0.71 ± 0.16 | 0.86 ± 0.16 | 1.08 ± 0.16 | 1.33 ± 0.06 |
| 8  | 1.00 ± 0.14 | 0.84 ± 0.02 | 0.81 ± 0.13 | 0.83 ± 0.21 |
| 17 | 1.82 ± 0.72 | 1.58 ± 0.49 | 1.3 ± 0.12  | 1.49 ± 0.35 |

Transcript level of different genes in developing wood determined by RT-qPCR. Actin, ubiquitin and cytochrome P450 were used as reference genes and expression levels were normalized to WT.

Means ± SE, n = 3 biological replicates.

**Table S5. Monosaccharide composition of non-cellulosic polymers determined by TMS (mol %) and cellulose content (%; w : w) in ball milled wood (BMW), LCC fractions and the residue in transgenic and WT samples.**

| Fraction | Line | Ara         | Rha         | Fuc         | Xyl          | Man           | MeGlcA      | Gal          | GalA         | Glc          | GlcA        | Updegraff Cellulose |
|----------|------|-------------|-------------|-------------|--------------|---------------|-------------|--------------|--------------|--------------|-------------|---------------------|
| BMW      | WT   | 2.91 ± 0.10 | 0.78 ± 0.02 | 0.61 ± 0.00 | 46.5 ± 1.4   | 3.69 ± 0.09   | 4.10 ± 0.11 | 2.00 ± 0.07  | 4.20 ± 0.17  | 34.0 ± 1.6   | 1.26 ± 0.08 | 17.7 ± 0.61         |
|          | TR   | 3.13 ± 0.11 | 0.74 ± 0.04 | 0.66 ± 0.04 | 44.1 ± 1.6   | 3.90 ± 0.10   | 3.95 ± 0.09 | 2.12 ± 0.14  | 4.09 ± 0.13  | 36.0 ± 1.5   | 1.35 ± 0.04 | 16.6 ± 1.68         |
| LCC-X    | WT   | 1.88 ± 0.07 | 2.57 ± 0.05 | 0.8 ± 0.09  | 47.0 ± 1.1   | 10.65 ± 0.32  | 2.03 ± 0.09 | 4.42 ± 0.12  | 5.86 ± 0.17  | 23.2 ± 0.3   | 1.55 ± 0.15 | ND                  |
|          | TR   | 2.08 ± 0.22 | 2.59 ± 0.07 | 0.75 ± 0.21 | 46.5 ± 0.8   | 10.47 ± 0.11  | 2.02 ± 0.18 | 4.84 ± 0.01* | 6.97 ± 0.19* | 22.2 ± 0.3*  | 1.53 ± 0.32 | ND                  |
| LCC-1    | WT   | 6.05 ± 0.35 | 5.72 ± 0.09 | 3.46 ± 0.43 | 13.5 ± 0.1   | 6.17 ± 0.18   | 3.69 ± 0.39 | 7.67 ± 0.31  | 42.14 ± 2.84 | 5.6 ± 0.3    | 6.00 ± 0.70 | ND                  |
|          | TR   | 5.61 ± 0.49 | 5.64 ± 0.16 | 2.78 ± 0.63 | 17.7 ± 0.9** | 7.01 ± 0.48   | 3.29 ± 0.56 | 7.07 ± 0.62  | 40.34 ± 4.64 | 5.7 ± 0.4    | 4.90 ± 1.05 | ND                  |
| LCC-2    | WT   | 1.86 ± 0.18 | 1.88 ± 0.05 | 1.13 ± 0.15 | 59.6 ± 0.3   | 3.61 ± 0.03   | 2.95 ± 0.02 | 2.20 ± 0.13  | 5.86 ± 0.23  | 19.0 ± 0.2   | 1.93 ± 0.20 | 17.6 ± 0.97         |
|          | TR   | 2.07 ± 0.17 | 2.06 ± 0.07 | 1.25 ± 0.17 | 58.9 ± 1.9   | 4.03 ± 0.02** | 3.09 ± 0.37 | 2.54 ± 0.15  | 6.02 ± 0.17  | 17.9 ± 1.2   | 2.10 ± 0.30 | 17.9 ± 1.75         |
| LCC-3    | WT   | 2.13 ± 0.32 | 2.28 ± 0.13 | 1.22 ± 0.36 | 63.1 ± 2.1   | 10.94 ± 0.09  | 3.67 ± 0.15 | 3.48 ± 0.33  | 7.14 ± 0.15  | 3.8 ± 0.1    | 2.29 ± 0.57 | ND                  |
|          | TR   | 2.12 ± 0.09 | 2.34 ± 0.03 | 1.12 ± 0.09 | 65.0 ± 0.3   | 10.25 ± 0.33* | 3.78 ± 0.12 | 3.30 ± 0.07  | 6.59 ± 0.50  | 3.3 ± 0.1**  | 2.17 ± 0.13 | ND                  |
| Residue  | WT   | 1.49 ± 0.01 | 1.66 ± 0.03 | 0.93 ± 0.00 | 63.4 ± 2.2   | 2.47 ± 0.05   | 2.78 ± 0.20 | 1.86 ± 0.12  | 4.2 ± 0.14   | 19.5 ± 1.9   | 1.73 ± 0.04 | 31.0 ± 1.01         |
|          | TR   | 1.61 ± 0.08 | 1.66 ± 0.03 | 1.03 ± 0.10 | 60.7 ± 1.4   | 2.73 ± 0.06** | 2.93 ± 0.11 | 2.02 ± 0.07  | 3.64 ± 0.10  | 21.8 ± 0.9** | 1.90 ± 0.16 | 24.2 ± 0.15**       |

Mean ± SE, n= 3 technical replicates. WT is combination of 6 individual trees. TR is combination of two trees from each transgenic line (8, 4, 17). ND = not detected. Asterisks correspond to means significantly different from WT according to the Fisher's test ( \* P ≤ 0.1, \*\* P ≤ 0.05, \*\*\* P ≤ 0.01, \*\*\*\*P ≤ 0.001 ).

**Table S6. Pyrolysis GC-MS analysis of milled wood powder, different LCC fractions, and the residue.**

| <b>Fraction</b> | <b>Line</b> | <b>C</b> | <b>G</b> | <b>S</b> | <b>H</b> | <b>P</b> | <b>L</b>  | <b>S/G</b> | <b>C/L</b> |
|-----------------|-------------|----------|----------|----------|----------|----------|-----------|------------|------------|
| milled wood     | WT          | 78.1 ±   | 7.72 ±   | 11.80 ±  | 1.24 ±   | 0.08 ±   | 20.8 ±    | 1.53 ±     | 3.75 ±     |
|                 |             | 0.5      | 0.14     | 0.08     | 0.29     | 0.00     | 0.4       | 0.03       | 0.09       |
|                 | TR          | 79.1 ±   | 7.81 ±   | 10.63 ±  | 1.41 ±   | 0.07 ±   | 19.9 ±    | 1.36 ±     | 3.97 ±     |
|                 |             | 0.4      | 0.21     | 0.27     | 0.12     | 0.01     | 0.4       | 0.02***    | 0.09*      |
| LCC-X           | WT          | 91.1 ±   | 2.79 ±   | 3.72 ±   | 1.34 ±   | 0.08 ±   | 7.9 ± 0.2 | 1.33 ±     | 11.50 ±    |
|                 |             | 0.2      | 0.05     | 0.03     | 0.11     | 0.01     |           | 0.02       | 0.26       |
|                 | TR          | 91.2 ±   | 3.01 ±   | 3.65 ±   | 1.24 ±   | 0.08 ±   | 8.0 ±     | 1.21 ±     | 11.42 ±    |
|                 |             | 0.1      | 0.02***  | 0.11     | 0.10     | 0.01     | 0.1       | 0.03**     | 0.22       |
| LCC-1           | WT          | 79.6 ±   | 7.26 ±   | 9.06 ±   | 2.39 ±   | 0.18 ±   | 18.9 ±    | 1.25 ±     | 4.21 ±     |
|                 |             | 0.7      | 0.44     | 0.23     | 0.05     | 0.00     | 0.6       | 0.04       | 0.17       |
|                 | TR          | 75.2 ±   | 8.51 ±   | 11.46 ±  | 2.75 ±   | 0.20 ±   | 22.9 ±    | 1.35 ±     | 3.29 ±     |
|                 |             | 0.5***   | 0.25**   | 0.22***  | 0.08**   | 0.02     | 0.5***    | 0.01**     | 0.10***    |
| LCC-2           | WT          | 57.5 ±   | 11.58 ±  | 17.23 ±  | 1.96 ±   | 0.06 ±   | 30.8 ±    | 1.49 ±     | 1.86 ±     |
|                 |             | 0.6      | 0.17     | 0.12     | 0.05     | 0.01     | 0.3       | 0.01       | 0.03       |
|                 | TR          | 59.6 ±   | 11.92 ±  | 15.85 ±  | 2.05 ±   | 0.08 ±   | 29.9 ±    | 1.33 ±     | 2.00 ±     |
|                 |             | 1.0*     | 0.73     | 0.78*    | 0.30     | 0.00     | 1.3       | 0.04**     | 0.09       |
| LCC-3           | WT          | 51.1 ±   | 14.36 ±  | 23.37 ±  | 2.83 ±   | 0.25 ±   | 40.8 ±    | 1.63 ±     | 1.25 ±     |
|                 |             | 0.4      | 0.49     | 0.35     | 0.14     | 0.01     | 0.7       | 0.03       | 0.01       |
|                 | TR          | 53.1 ±   | 14.05 ±  | 21.63 ±  | 2.69 ±   | 0.25 ±   | 38.6 ±    | 1.55 ±     | 1.39 ±     |
|                 |             | 0.5      | 0.53     | 1.04     | 0.10     | 0.00     | 1.5       | 0.02**     | 0.06       |
| Residue         | WT          | 50.2 ±   | 6.27 ±   | 10.84 ±  | 0.82 ±   | 0.04 ±   | 18.0 ±    | 1.73 ±     | 2.86 ±     |
|                 |             | 1.8      | 0.71     | 1.09     | 0.06     | 0.00     | 1.7       | 0.02       | 0.13       |
|                 | TR          | 57.9 ±   | 6.46 ±   | 9.54 ±   | 0.63 ±   | 0.03 ±   | 16.7 ±    | 1.48 ±     | 3.48 ±     |
|                 |             | 1.0      | 0.43     | 0.65     | 0.01**   | 0.00     | 1.1       | 0.00**     | 0.16**     |

C-Carbohydrates, G - Guaiacyl lignin, S - Syringyl lignin, H - *p*-hydroxyphenyl, P - phenolics, L - G+S+H+P, S/G - Syringyl to Guaiacyl ratio. All values are relative. Mean ± SE, n= 3 technical replicates. WT is combination of 6 individual trees. Trans is combination of two trees from each transgenic line (8, 4, 17). Asterisks correspond to means significantly different from WT

**Table S7. Primers used for qPCR analysis**

| Oligo name             | Target gene ID   | Name of gene | Length of oligos | Sequence (5'-3')                                         | Efficiency |
|------------------------|------------------|--------------|------------------|----------------------------------------------------------|------------|
| DFC2_1F<br>DFC2_1R     | CAA01634         | AXE          | 194              | CTGGACGATTAGCGAGTACG<br>CGCAGGTGGAATTCCATCC              | 2.05       |
| ACT11 for<br>ACT11 rev | Potri.006G192700 | ACTIN        | 208              | TATTGTTCTCAGTGGTGGCTCT<br>GGACTCATCATACTCTGCCTTT         | 1.9        |
| CYP for<br>CYP rev     | Potri.004G168800 | CYP          | 234              | TAAGACCGAATGGCTTGACG<br>AGAACGCACCCCAAACTACTA            | 2          |
| TUB_for<br>TUB_rev     | Potri.001G464400 | TUB          | 200              | ATTCCCTCGCCTTCATTTCT<br>CCTCTTTCGTGCTCATCTTACC           | 1.9        |
| UBQ-L_for<br>UBQ-L_rev | Potri.005G198700 | UBQ          | 200              | TGGCAAGACCATAACTCTCG<br>CTCCCCTAAGCCTCAAAACC             | 1.86       |
| COMT-F<br>COMT-R       | Potri.012G006400 | COMT         | 125              | AGCACAATCGTCTCCAAGTACCT<br>AACATTCTCCACACCAGGGAAAGC      | 2.02       |
| F5H-F<br>F5H-R         | Potri.007G016400 | F5H          | 125              | AAGCCAATATAGGCAAGCCTGTGAATC<br>ATTTTTAGCCCCGAAAGCTGCTCTG | 1.86       |
| GT43Afor1<br>GT43Arev1 | Potri.006G131000 | GT43A        | 213              | GTCGCCCTTCATCTGTCC<br>TCCCTCATAGTTTTCTCCTGCT             | 2.11       |
| GT43Bfor1<br>GT43Brev1 | Potri.016G086400 | GT43B        | 183              | GTCGCCCTTCTTCAGTCCAG<br>TTTTGTCTTCTTGATTTTCCTGA          | 2.01       |
