# Supplementary material for: In muro deacetylation of xylan affects lignin properties and improves saccharification of aspen wood
Source: PubMed Central journal article supplement (PMC5397736; doi:10.1186/s13068-017-0782-4), 2017-04-20
Supplement: 13068_2017_782_MOESM5_ESM.pdf [file 13068_2017_782_MOESM5_ESM.pdf]

**Additional file 5. Changes in polysaccharide composition and cellulose in *AnAXE1* expressing lines (4, 17) compared to the wild type (WT).**

| Line | Soluble polysaccharide composition (mol %) |                |                               |                |                |                               |                |                               | Updegraff cellulose<br>(% wood<br>d.w) | Relative<br>crystallinity<br>(% WT) |                           |
|------|--------------------------------------------|----------------|-------------------------------|----------------|----------------|-------------------------------|----------------|-------------------------------|----------------------------------------|-------------------------------------|---------------------------|
|      | Ara                                        | Rha            | Xyl                           | Man            | MeGlcA         | Gal                           | GalA           | Glc                           |                                        | NMR<br>cellulose                    | XRD<br>sample             |
| WT   | 1.37 ±<br>0.05                             | 1.39 ±<br>0.02 | <b>65.5 ±</b><br><b>0.7**</b> | 5.04 ±<br>0.64 | 3.11 ±<br>0.06 | <b>1.53 ±</b><br><b>0.10*</b> | 4.98 ±<br>0.19 | <b>17.1 ±</b><br><b>0.6**</b> | 44.6 ±<br>0.7                          | <b>100 ±</b><br><b>0****</b>        | <b>100 ±</b><br><b>2*</b> |
| 4    | 1.46 ±<br>0.03                             | 1.30 ±<br>0.07 | 62.3 ±<br>1.4**               | 5.66 ±<br>0.93 | 2.95 ±<br>0.14 | 1.74 ±<br>0.09                | 4.68 ±<br>0.15 | 19.9 ±<br>1.3                 | 44.0 ±<br>0.7                          | 108 ±<br>2****                      | 102 ±<br>3                |
| 17   | 1.46 ±<br>0.06                             | 1.48 ±<br>0.01 | 62.9 ±<br>0.8*                | 5.48 ±<br>0.59 | 3.12 ±<br>0.08 | 1.88 ±<br>0.11                | 5.25 ±<br>0.0  | 18.5 ±<br>0.2                 | 47.9 ±<br>2.1                          | 105 ±<br>4**                        | 106 ±<br>3*               |

Mean ± SE,  $n = (3-5)$  biological replicates except for lignin S/G ratio, where  $n = (8-18)$  biological replicates were analyzed. Asterisks next to individual lines correspond to means significantly different from wild type (WT) according to the post ANOVA Student's  $t$ -test. Asterisks next to WT values in bold type denote significance of contrast between WT and all lines. (\* -  $P \leq 0.1$ , \*\* -  $P \leq 0.5$ \*, \*\*\* -  $P \leq 0.01$ ). NMR - nuclear magnetic resonance; XRD = X-ray diffraction.
