# Supplementary material for: In muro deacetylation of xylan affects lignin properties and improves saccharification of aspen wood
Source: PubMed Central journal article supplement (PMC5397736; doi:10.1186/s13068-017-0782-4), 2017-04-20
Supplement: 13068_2017_782_MOESM7_ESM.pdf [file 13068_2017_782_MOESM7_ESM.pdf]

**Additional file 7. Pyrolysis GC-MS analysis of wood of transgenic (lines 8, 4, and 17) and wild type (WT) trees.**

| <b>Line</b> | <b>C</b>        | <b>G</b>                        | <b>S</b>                         | <b>H</b>       | <b>P</b>       | <b>L</b>        | <b>S/G</b>                      |
|-------------|-----------------|---------------------------------|----------------------------------|----------------|----------------|-----------------|---------------------------------|
| WT          | 63.08 ±<br>0.52 | <b>11.04 ±</b><br><b>0.16**</b> | <b>18.10 ±</b><br><b>0.24***</b> | 1.89 ±<br>0.05 | 0.30 ±<br>0.01 | 31.33 ±<br>0.37 | <b>1.64 ±</b><br><b>0.02***</b> |
| 8           | 63.38 ±<br>0.46 | 11.41 ±<br>0.28                 | 17.39 ±<br>0.35                  | 1.83 ±<br>0.08 | 0.28 ±<br>0.01 | 30.90 ±<br>0.65 | 1.53 ±<br>0.02**                |
| 4           | 63.51 ±<br>0.61 | 12.13 ±<br>0.19**               | 16.35 ±<br>0.4**                 | 1.80 ±<br>0.09 | 0.28 ±<br>0.01 | 30.56 ±<br>0.45 | 1.35 ±<br>0.04**                |
| 17          | 63.88 ±<br>0.38 | 11.09 ±<br>0.27                 | 17.36 ±<br>0.19                  | 1.81 ±<br>0.11 | 0.27 ±<br>0.01 | 30.54 ±<br>0.40 | 1.52 ±<br>0.04*                 |

C-Carbohydrates, G - Guaiacyl lignin, S - Syringyl lignin, H - *p*-hydroxyphenyl, P - phenolics, L - G+S+H+P, S/G - Syringyl to guaiacyl ratio. All values are relative to the sum of detected identified signals. Mean ± *SE*, *n* = (8-18) biological replicates. Asterisks next to individual lines correspond to means significantly different from wild type (WT) according to the Student's *t*-test. Asterisks next to WT values in bold type denote significance of contrast between WT and transgenic lines (\* - *P* ≤ 0.1, \*\* - *P* ≤ 0.05, \*\*\* - *P* ≤ 0.01).
