# Supplementary material for: In muro deacetylation of xylan affects lignin properties and improves saccharification of aspen wood
Source: PubMed Central journal article supplement (PMC5397736; doi:10.1186/s13068-017-0782-4), 2017-04-20
Supplement: 13068_2017_782_MOESM11_ESM.pdf [file 13068_2017_782_MOESM11_ESM.pdf]

**Additional file 11. Primers used for qPCR analysis**

| Oligo name             | Target gene ID   | Name of gene | Length of oligos | Sequence (5'-3')                                         | Efficiency |
|------------------------|------------------|--------------|------------------|----------------------------------------------------------|------------|
| DFC2_1F<br>DFC2_1R     | CAA01634         | AXE          | 194              | CTGGACGATTAGCGAGTACG<br>CGCAGGTGGAATTCCATCC              | 2.1        |
| ACT11 for<br>ACT11 rev | Potri.006G192700 | ACTIN        | 208              | TATTGTTCTCAGTGGTGGCTCT<br>GGACTCATCATACTCTGCCTTT         | 1.9        |
| CYP for<br>CYP rev     | Potri.004G168800 | CYP          | 234              | TAAGACCGAATGGCTTGACG<br>AGAACGCACCCCAAACTACTA            | 2.0        |
| TUB_for<br>TUB_rev     | Potri.001G464400 | TUB          | 200              | ATCCCTCGCCTTCATTTCT<br>CCTCTTTCGTGCTCATCTTACC            | 1.9        |
| UBQ-L_for<br>UBQ-L_rev | Potri.005G198700 | UBQ          | 200              | TGGCAAGACCATAACTCTCG<br>CTCCCCTAAGCCTCAAACC              | 1.9        |
| COMT-F<br>COMT-R       | Potri.012G006400 | COMT         | 125              | AGCACAATCGTCTCCAAGTACCCT<br>AACATTCTCCACACCAGGGAAAGC     | 2.0        |
| F5H-F<br>F5H-R         | Potri.007G016400 | F5H          | 125              | AAGCCAATATAGGCAAGCCTGTGAATC<br>ATTTTTAGCCCCGAAAGCTGCTCTG | 1.9        |
| GT43Afor1<br>GT43Arev1 | Potri.006G131000 | GT43A        | 213              | GTCGCCCTTCATCTGTCC<br>TCCCTCATAGTTTTCTCCTGCT             | 2.1        |
| GT43Bfor1<br>GT43Brev1 | Potri.016G086400 | GT43B        | 183              | GTCGCCCTTCTTCAGTCCAG<br>TTTTGTCTTCTTGATTTTCCTGA          | 2.0        |
