# Supplementary material for: In muro deacetylation of xylan affects lignin properties and improves saccharification of aspen wood
Source: Biotechnol Biofuels. 2017 Apr 20;10:98. doi: 10.1186/s13068-017-0782-4 (PMC5397736; doi:10.1186/s13068-017-0782-4)
Supplement: Supplementary file 10 — Additional file 10. Pyrolysis–GC–MS analysis of BMW, LCC fractions, and the residue. [file 13068_2017_782_MOESM10_ESM.pdf]

**Additional file 10. Pyrolysis GC-MS analysis of ball milled wood (BMW), different LCC fractions, and the residue.**

| Fraction | Line | C             | G              | S               | H             | P           | L             | S/G            | C/L            |
|----------|------|---------------|----------------|-----------------|---------------|-------------|---------------|----------------|----------------|
| BMW      | WT   | 78.1 ± 0.5    | 7.72 ± 0.14    | 11.80 ± 0.08    | 1.24 ± 0.29   | 0.08 ± 0.00 | 20.8 ± 0.4    | 1.53 ± 0.03    | 3.75 ± 0.09    |
|          |      | 79.1 ± 0.4    | 7.81 ± 0.21    | 10.63 ± 0.27    | 1.41 ± 0.12   | 0.07 ± 0.01 | 19.9 ± 0.4    | 1.36 ± 0.02*** | 3.97 ± 0.09*   |
|          | TR   | 91.1 ± 0.2    | 2.79 ± 0.05    | 3.72 ± 0.03     | 1.34 ± 0.11   | 0.08 ± 0.01 | 7.9 ± 0.2     | 1.33 ± 0.02    | 11.50 ± 0.26   |
|          |      | 91.2 ± 0.1    | 3.01 ± 0.02*** | 3.65 ± 0.11     | 1.24 ± 0.10   | 0.08 ± 0.01 | 8.0 ± 0.1     | 1.21 ± 0.03**  | 11.42 ± 0.22   |
| LCC-1    | WT   | 79.6 ± 0.7    | 7.26 ± 0.44    | 9.06 ± 0.23     | 2.39 ± 0.05   | 0.18 ± 0.00 | 18.9 ± 0.6    | 1.25 ± 0.04    | 4.21 ± 0.17    |
|          |      | 75.2 ± 0.5*** | 8.51 ± 0.25**  | 11.46 ± 0.22*** | 2.75 ± 0.08** | 0.20 ± 0.02 | 22.9 ± 0.5*** | 1.35 ± 0.01**  | 3.29 ± 0.10*** |
|          | TR   | 57.5 ± 0.6    | 11.58 ± 0.17   | 17.23 ± 0.12    | 1.96 ± 0.05   | 0.06 ± 0.01 | 30.8 ± 0.3    | 1.49 ± 0.01    | 1.86 ± 0.03    |
|          |      | 59.6 ± 1.0*   | 11.92 ± 0.73   | 15.85 ± 0.78*   | 2.05 ± 0.30   | 0.08 ± 0.00 | 29.9 ± 1.3    | 1.33 ± 0.04**  | 2.00 ± 0.09    |
| LCC-2    | WT   | 51.1 ± 0.4    | 14.36 ± 0.49   | 23.37 ± 0.35    | 2.83 ± 0.14   | 0.25 ± 0.01 | 40.8 ± 0.7    | 1.63 ± 0.03    | 1.25 ± 0.01    |
|          |      | 53.1 ± 0.5    | 14.05 ± 0.53   | 21.63 ± 1.04    | 2.69 ± 0.10   | 0.25 ± 0.00 | 38.6 ± 1.5    | 1.55 ± 0.02**  | 1.39 ± 0.06    |
|          | TR   | 50.2 ± 1.8    | 6.27 ± 0.71    | 10.84 ± 1.09    | 0.82 ± 0.06   | 0.04 ± 0.00 | 18.0 ± 1.7    | 1.73 ± 0.02    | 2.86 ± 0.13    |
|          |      | 57.9 ± 1.0    | 6.46 ± 0.43    | 9.54 ± 0.65     | 0.63 ± 0.01** | 0.03 ± 0.00 | 16.7 ± 1.1    | 1.48 ± 0.00**  | 3.48 ± 0.16**  |
| Residue  | WT   | 79.6 ± 0.7    | 7.26 ± 0.44    | 9.06 ± 0.23     | 2.39 ± 0.05   | 0.18 ± 0.00 | 18.9 ± 0.6    | 1.25 ± 0.04    | 4.21 ± 0.17    |
|          |      | 75.2 ± 0.5*** | 8.51 ± 0.25**  | 11.46 ± 0.22*** | 2.75 ± 0.08** | 0.20 ± 0.02 | 22.9 ± 0.5*** | 1.35 ± 0.01**  | 3.29 ± 0.10*** |
|          | TR   | 57.5 ± 0.6    | 11.58 ± 0.17   | 17.23 ± 0.12    | 1.96 ± 0.05   | 0.06 ± 0.01 | 30.8 ± 0.3    | 1.49 ± 0.01    | 1.86 ± 0.03    |
|          |      | 59.6 ± 1.0*   | 11.92 ± 0.73   | 15.85 ± 0.78*   | 2.05 ± 0.30   | 0.08 ± 0.00 | 29.9 ± 1.3    | 1.33 ± 0.04**  | 2.00 ± 0.09    |

C-Carbohydrates, G - Guaiacyl lignin, S - Syringyl lignin, H - *p*-hydroxyphenyl, P - phenolics, L - G+S+H+P, S/G - Syringyl to Guaiacyl ratio. All values are relative. Mean ± SE, *n* = 3 technical replicates. WT is combination of 6 individual trees. Trans is combination of two trees from each transgenic line (8, 4, 17). Asterisks correspond to means significantly different from WT according to the ANOVA (\* *P* ≤ 0.1, \*\* *P* ≤ 0.05, \*\*\* *P* ≤ 0.01).
